# Supplementary material for: Prophylactic action of ayahuasca in a non-human primate model of depressive-like behavior
Source: Frontiers journal article supplement (doi:10.3389/fnbeh.2022.901425), 2022-11-04
Supplement: Table_1.pdf [file Table_1.pdf]

## Supplementary material

**Table S1.** Ages and body weight by group at beginning of study.

| Group     | Animal | Age (months) | Weight (g) |
|-----------|--------|--------------|------------|
| Familiar  | 1255   | 8            | 225.5      |
|           | 1269   | 7            | 273        |
|           | 1271   | 7            | 193        |
|           | 1279   | 7            | 228        |
|           | 1287   | 7            | 289.5      |
|           | 2808   | 7            | 276        |
|           | 2820   | 7            | 268        |
| Isolated  | 1261   | 7            | 241.5      |
|           | 1259   | 7            | 188.5      |
|           | 1263   | 7            | 257        |
|           | 1273   | 7            | 237        |
|           | 1275   | 7            | 264        |
| Ayahuasca | 1407   | 9            | 228        |
|           | 1409   | 9            | 240        |
|           | 1419   | 8            | 236        |
|           | 1417   | 7            | 250        |
|           | Ex05   | 8            | 254        |
|           | Ex07   | 8            | 238        |

All animals were within the juvenile II stage (7-10 months), according to the classification by Castro Leão (2009), which is an already consolidated stable developmental stage.
