# Supplementary material for: Prophylactic action of ayahuasca in a non-human primate model of depressive-like behavior
Source: Frontiers journal article supplement (doi:10.3389/fnbeh.2022.901425), 2022-11-04
Supplement: Table_2.pdf [file Table_2.pdf]

## Supplementary material

**Table S2.** Median and interquartile range ( $M_d(Q_{25}, Q_{75})$ ) data at baseline and final week by groups.

|                                |      | Familiar Control Group  |                        | Isolated Control Group |                         | Ayahuasca Group          |                        |
|--------------------------------|------|-------------------------|------------------------|------------------------|-------------------------|--------------------------|------------------------|
|                                |      | BP                      | FW                     | BP                     | FW                      | BP                       | FW                     |
| <b>Sucrose solution intake</b> | (s)  | 8.30<br>(0.29,60.5)     | 2.30<br>(0.0,52.0)     | 17.03<br>(1.5,47.0)    | 0.00<br>(0.0,0.5)       | 31.25<br>(10.0,55.1)     | 53.33<br>(41.0,94.7)   |
| <b>Scent-mark</b>              | (f)  | 1.00<br>(0.00,3.00)     | 1.00<br>(0.00,4.60)    | 2.33<br>(0.50,4.00)    | 4.00<br>(2.00,7.50)     | 1.00<br>(0.00,1.00)      | 1.00<br>(0.00,3.00)    |
| <b>Autogrooming</b>            | (s)  | 2.01<br>(0.00,29.75)    | 1.00<br>(0.00,19.80)   | 0.00<br>(0.00,4.25)    | 20.66<br>(0.00,110.71)  | 0.00<br>(0.00,4.37)      | 0.00<br>(0.00,0.25)    |
| <b>Food Ingestion</b>          | (s)  | 65.00<br>(25.96,102.60) | 36.43<br>(7.59,69.90)  | 54.79<br>(17.50,82.00) | 35.15<br>(12.03,75.64)  | 189.00<br>(94.50,311.75) | 58.50<br>(0.00,107.25) |
| <b>Locomotion</b>              | (f)  | 24.00<br>(15.50,34.75)  | 23.00<br>(8.50,52.00)  | 29.00<br>(14.50,39.50) | 30.00<br>(15.50,58.00)  | 18.00<br>(11.00,23.25)   | 35.00<br>(18.50,58.50) |
| <b>Scratching</b>              | (s)  | 47.34<br>(23.91,67.53)  | 31.46<br>(16.58,57.00) | 31.45<br>(24.63,46.38) | 82.78<br>(52.62,118.26) | 19.50<br>(5.00,42.75)    | 33.00<br>(5.00,69.37)  |
| <b>Piloerection</b>            | (f)  | 0.00<br>(0.00,0.00)     | 0.00<br>(0.00,0.00)    | 0.00<br>(0.00,0.00)    | 0.00<br>(0.00,0.00)     | 0.00<br>(0.00,0.00)      | 0.00<br>(0.00,0.00)    |
| <b>Cortisol</b>                | (ng) | 2.97<br>(1.55,5.05)     | 4.24<br>(2.56,6.38)    | 2.10<br>(1.17,3.61)    | 1.69<br>(1.07,2.71)     | 0.23<br>(0.09,1.15)      | 0.64<br>(0.18,8.82)    |
| <b>Age<sup>&amp;</sup></b>     | (m)  | 7 (7,7)                 | -                      | 7 (7,7)                | -                       | 8 (7.75,9)               | -                      |
| <b>Weight<sup>#</sup></b>      | (g)  | 268<br>(226.75,274.5)   | -                      | 241.5<br>(237,257)     | -                       | 239<br>(236.5,247.5)     | -                      |

BP = baseline phase, FW = final week, s = seconds, f = frequency, m = months.

&: All animals were 7-9 months old, within the juvenile II stage (7-10 months), according to the classification by Castro Leão (2009).

#: No weight difference between groups was found (Kruskal-Wallis:  $H = 0.698$ ,  $p = 0.706$ ).
