# Supplementary material for: Prophylactic action of ayahuasca in a non-human primate model of depressive-like behavior
Source: Frontiers journal article supplement (doi:10.3389/fnbeh.2022.901425), 2022-11-04
Supplement: Table_4.pdf [file Table_4.pdf]

## Supplementary material

**Table S4.** Median and quartiles ( $M_d(Q25, Q75)$ ) for baseline behaviors considered important according to the Boruta algorithm, along with the respective significance test.

|                                                    |     | Familiar<br>Control Group | Isolated<br>Control Group | Ayahuasca<br>Group  | H (p-value)     | Post-hoc (p-value)                                    |
|----------------------------------------------------|-----|---------------------------|---------------------------|---------------------|-----------------|-------------------------------------------------------|
| <b><math>\Sigma</math> Sucrose solution intake</b> | (s) | 58.1<br>(27.7,261)        | 129<br>(109,264)          | 284<br>(172,351)    | 2.78<br>(0.249) | -                                                     |
| <b><math>\Sigma</math> Autogrooming</b>            | (s) | 61.5<br>(14.7,220)        | 14.3<br>(4.9,15)          | 14.6<br>(5.21,27.7) | 2.73<br>(0.255) | -                                                     |
| <b><math>\Sigma</math> Food Ingestion</b>          | (s) | 459<br>(400,609)          | 384<br>(254,407)          | 1480<br>(1088,1732) | 11.3<br>(0.003) | AG > FG (0.007)<br>AG > IG (0.013)<br>FG = IG (0.927) |
| <b><math>\Sigma</math> Scratching</b>              | (s) | 344<br>(267,419)          | 222<br>(214,233)          | 177<br>(115,265)    | 4.07<br>(0.131) | -                                                     |

BP = baseline phase, FW = final week, s = seconds, f = frequency, m = months,  $\Sigma$  = sum of individual data, H = H-statistic (Kruskal-Wallis).

Despite the greater food intake in the ayahuasca group, it is not correlated with sucrose solution intake (Spearman:  $r = 0.66$ ,  $p = 0.175$ ).

All animals were 7-9 months old, within the juvenile II stage (7-10 months), according to the classification by Castro Leão (2009).
